# Supplementary material
Source: PubMed Central journal article supplement (PMC6262897)

# Figure S1

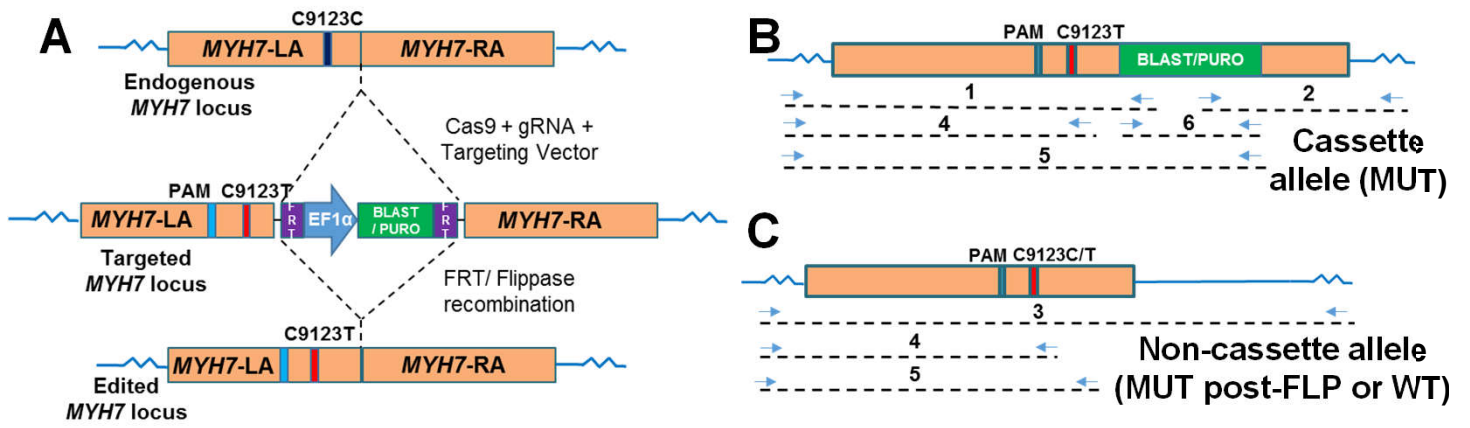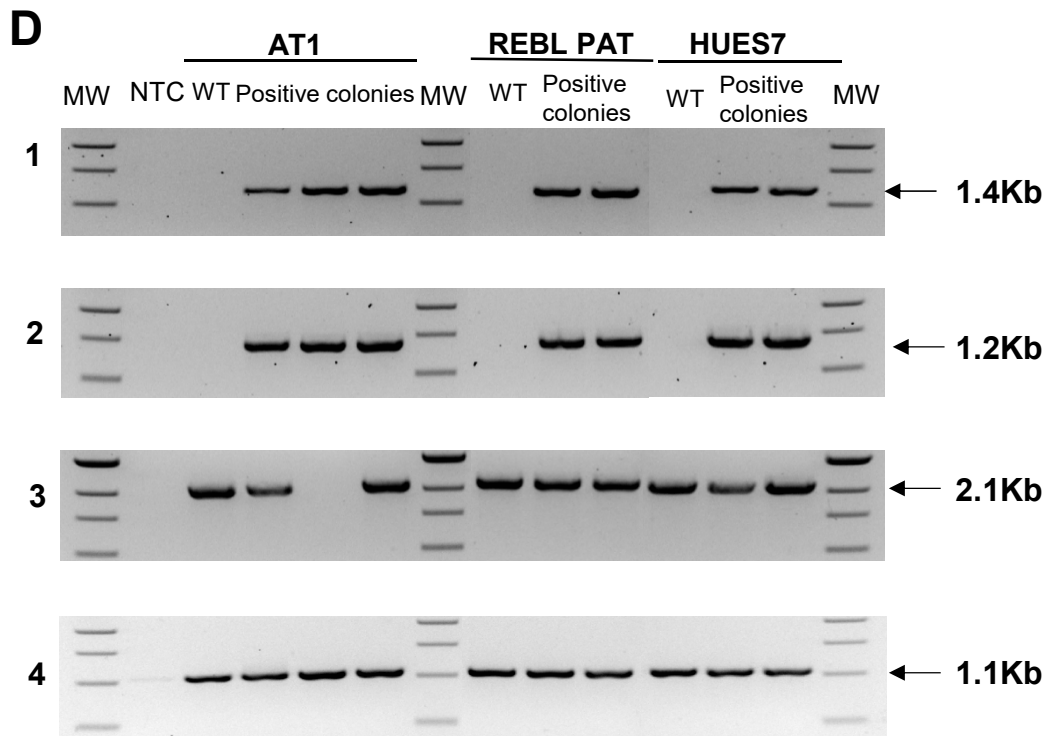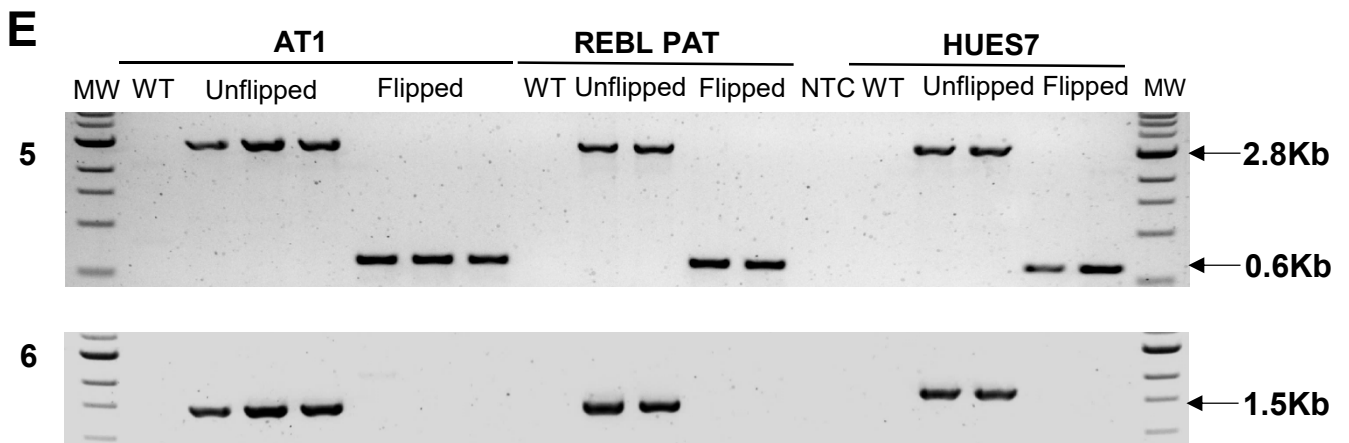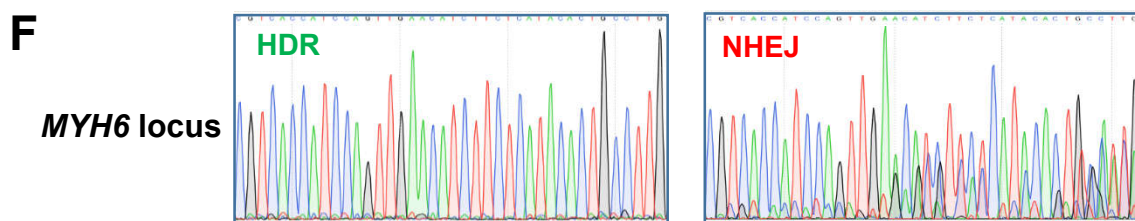

# Figure S2

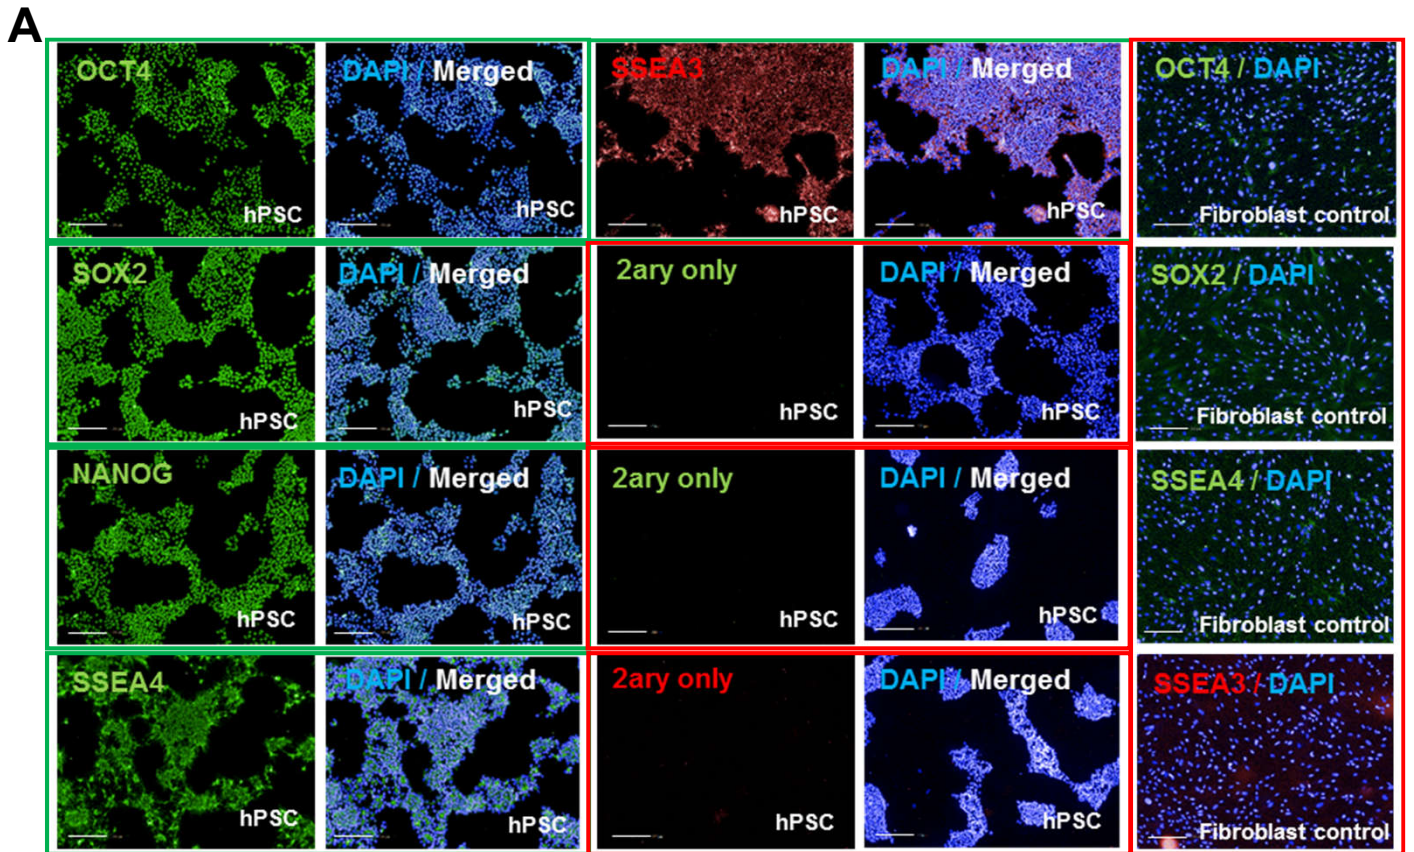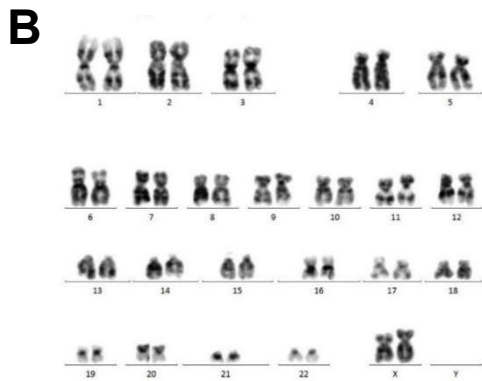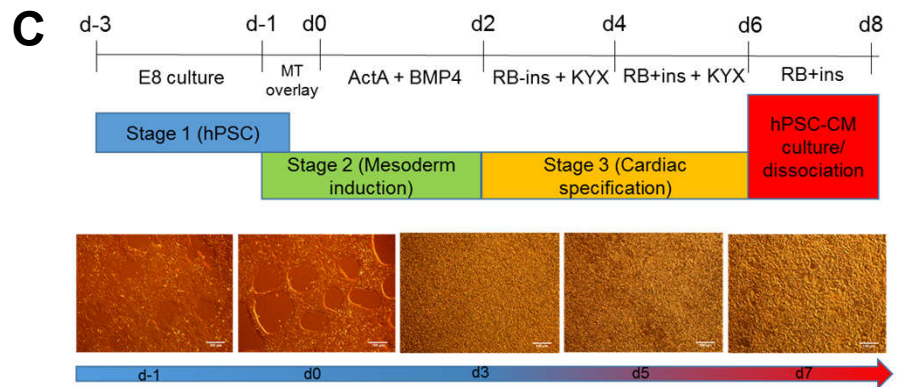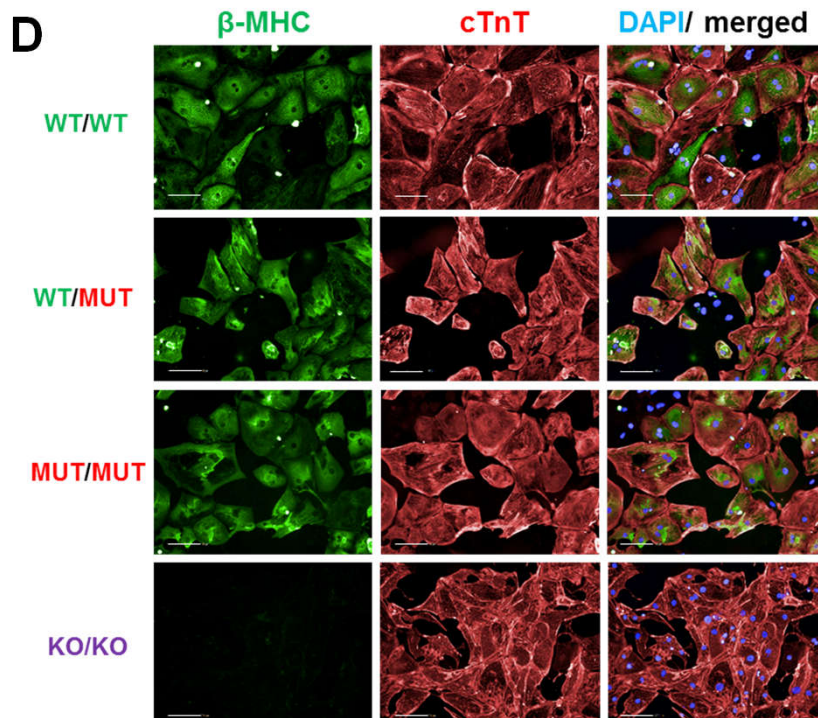

# Figure S3

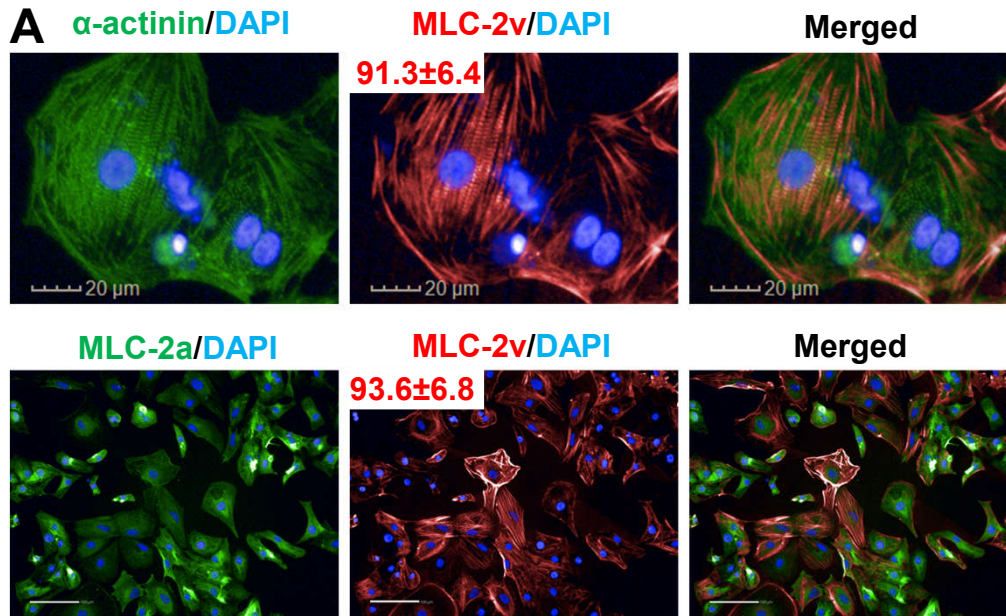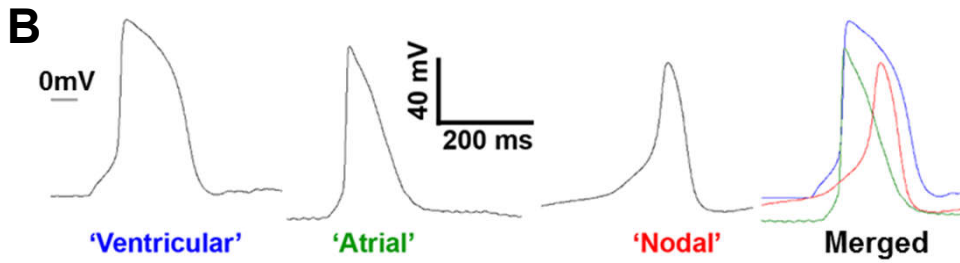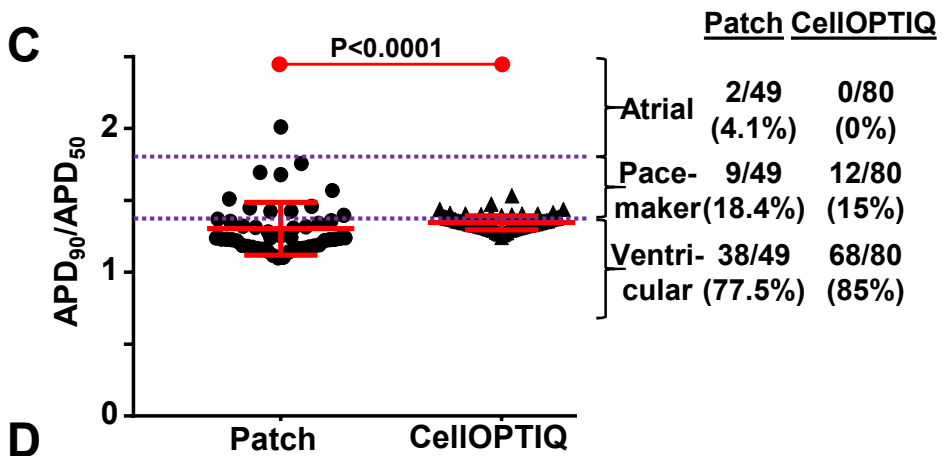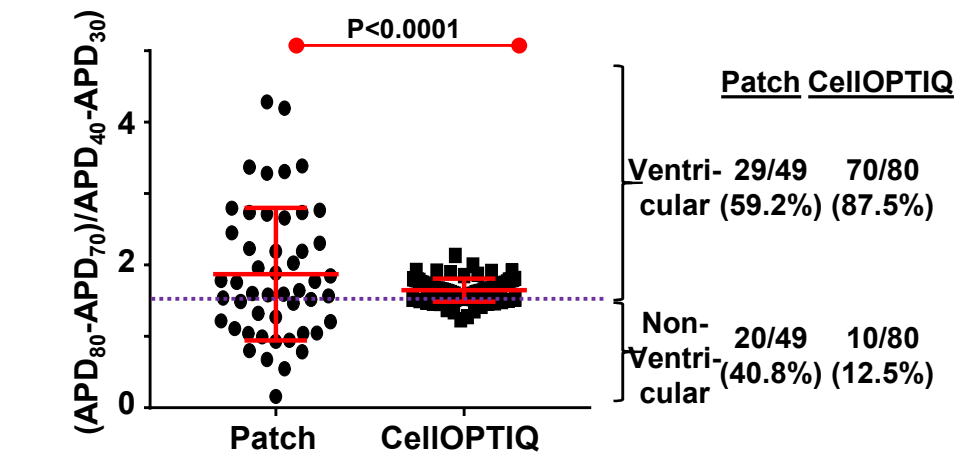

# Figure S4

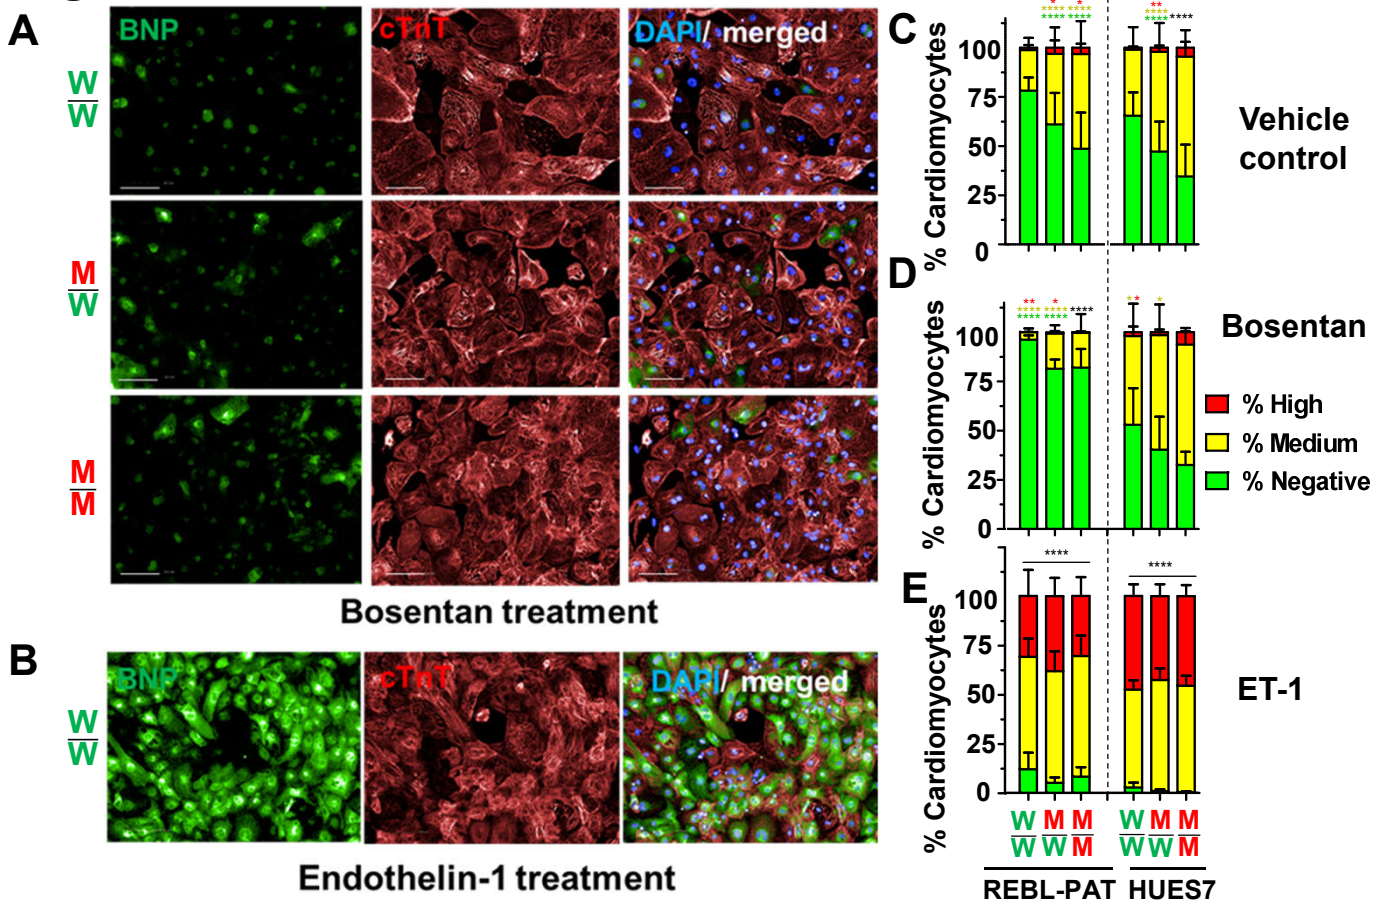

**Figure S5**

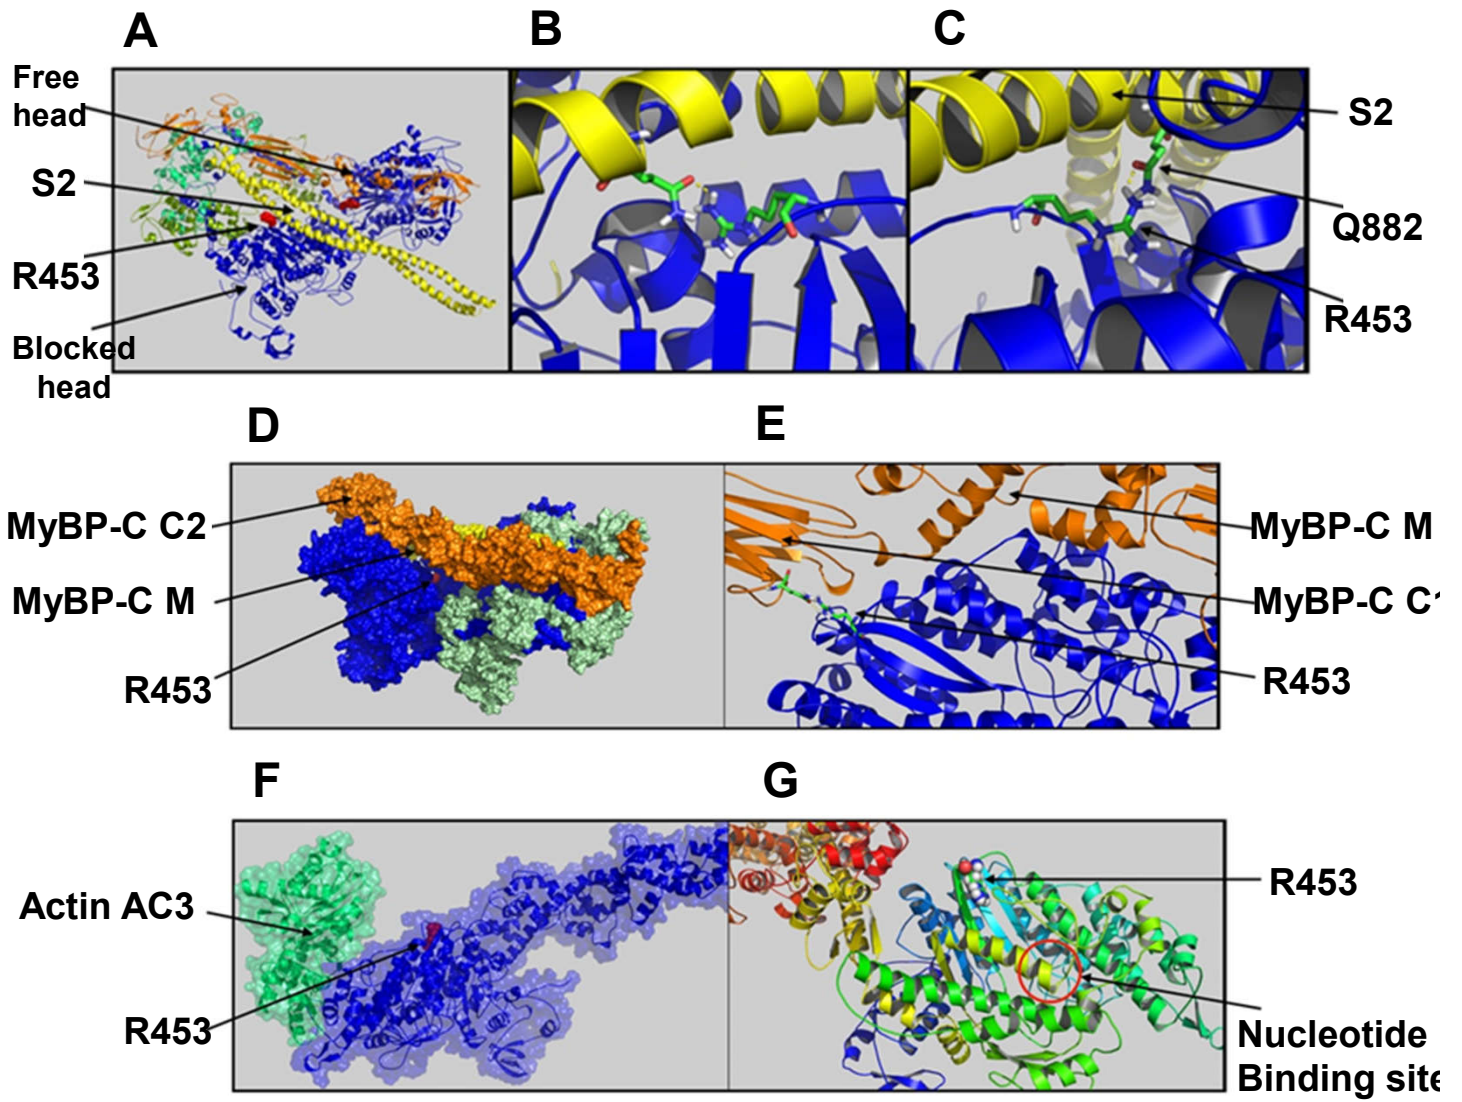

**Figure S6**

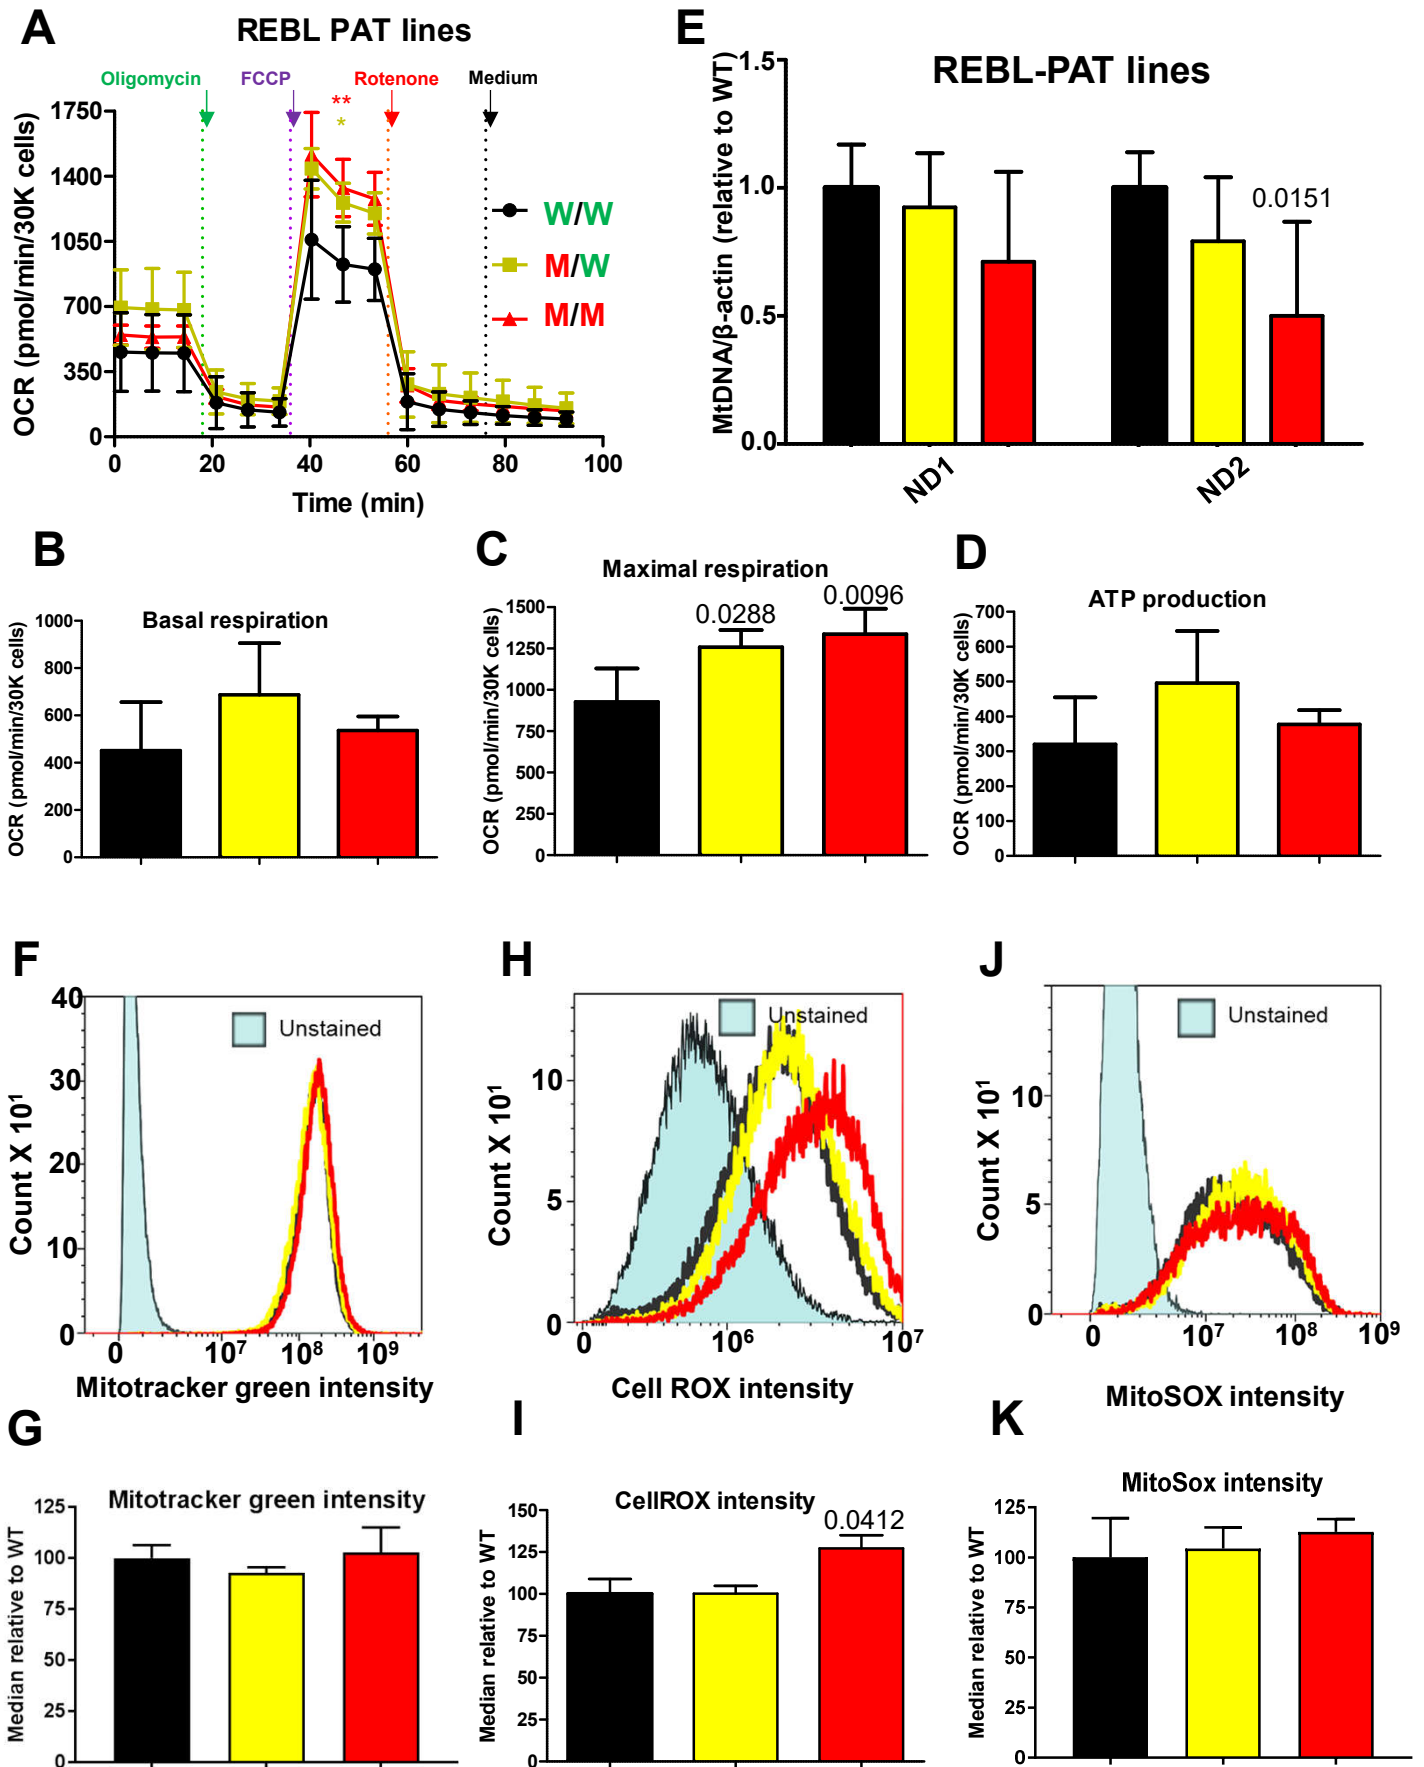

# Figure S7

AAVS1 gene

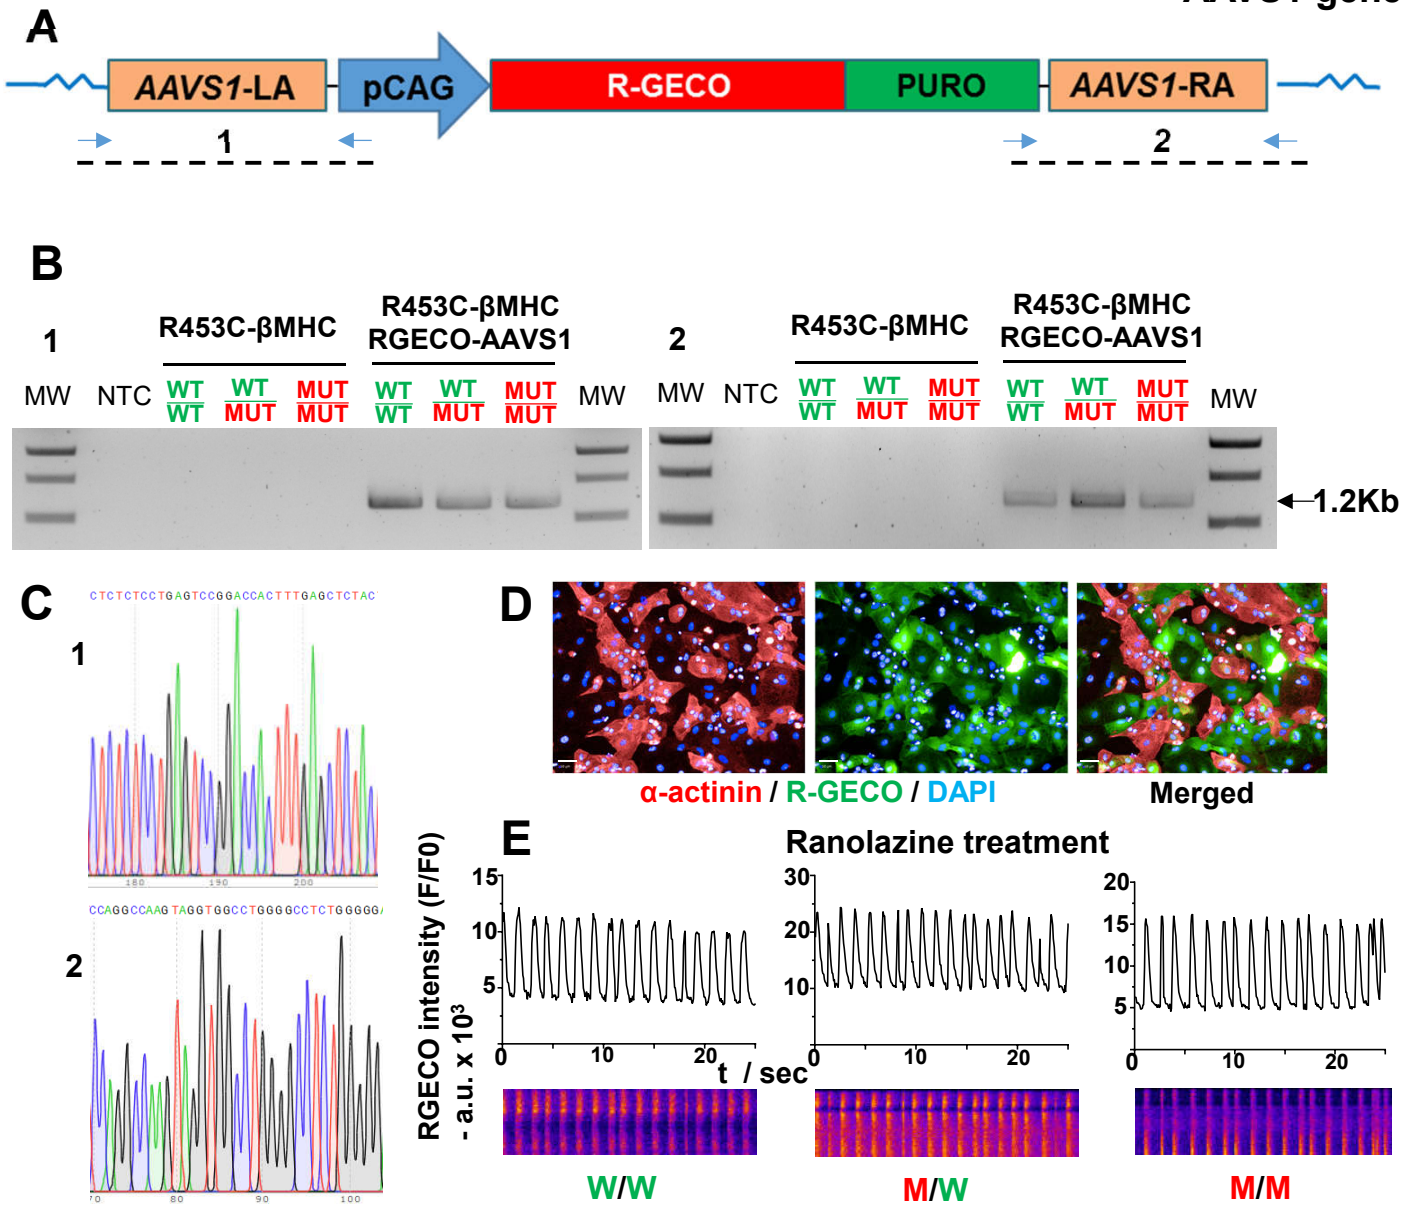

# Figure S8

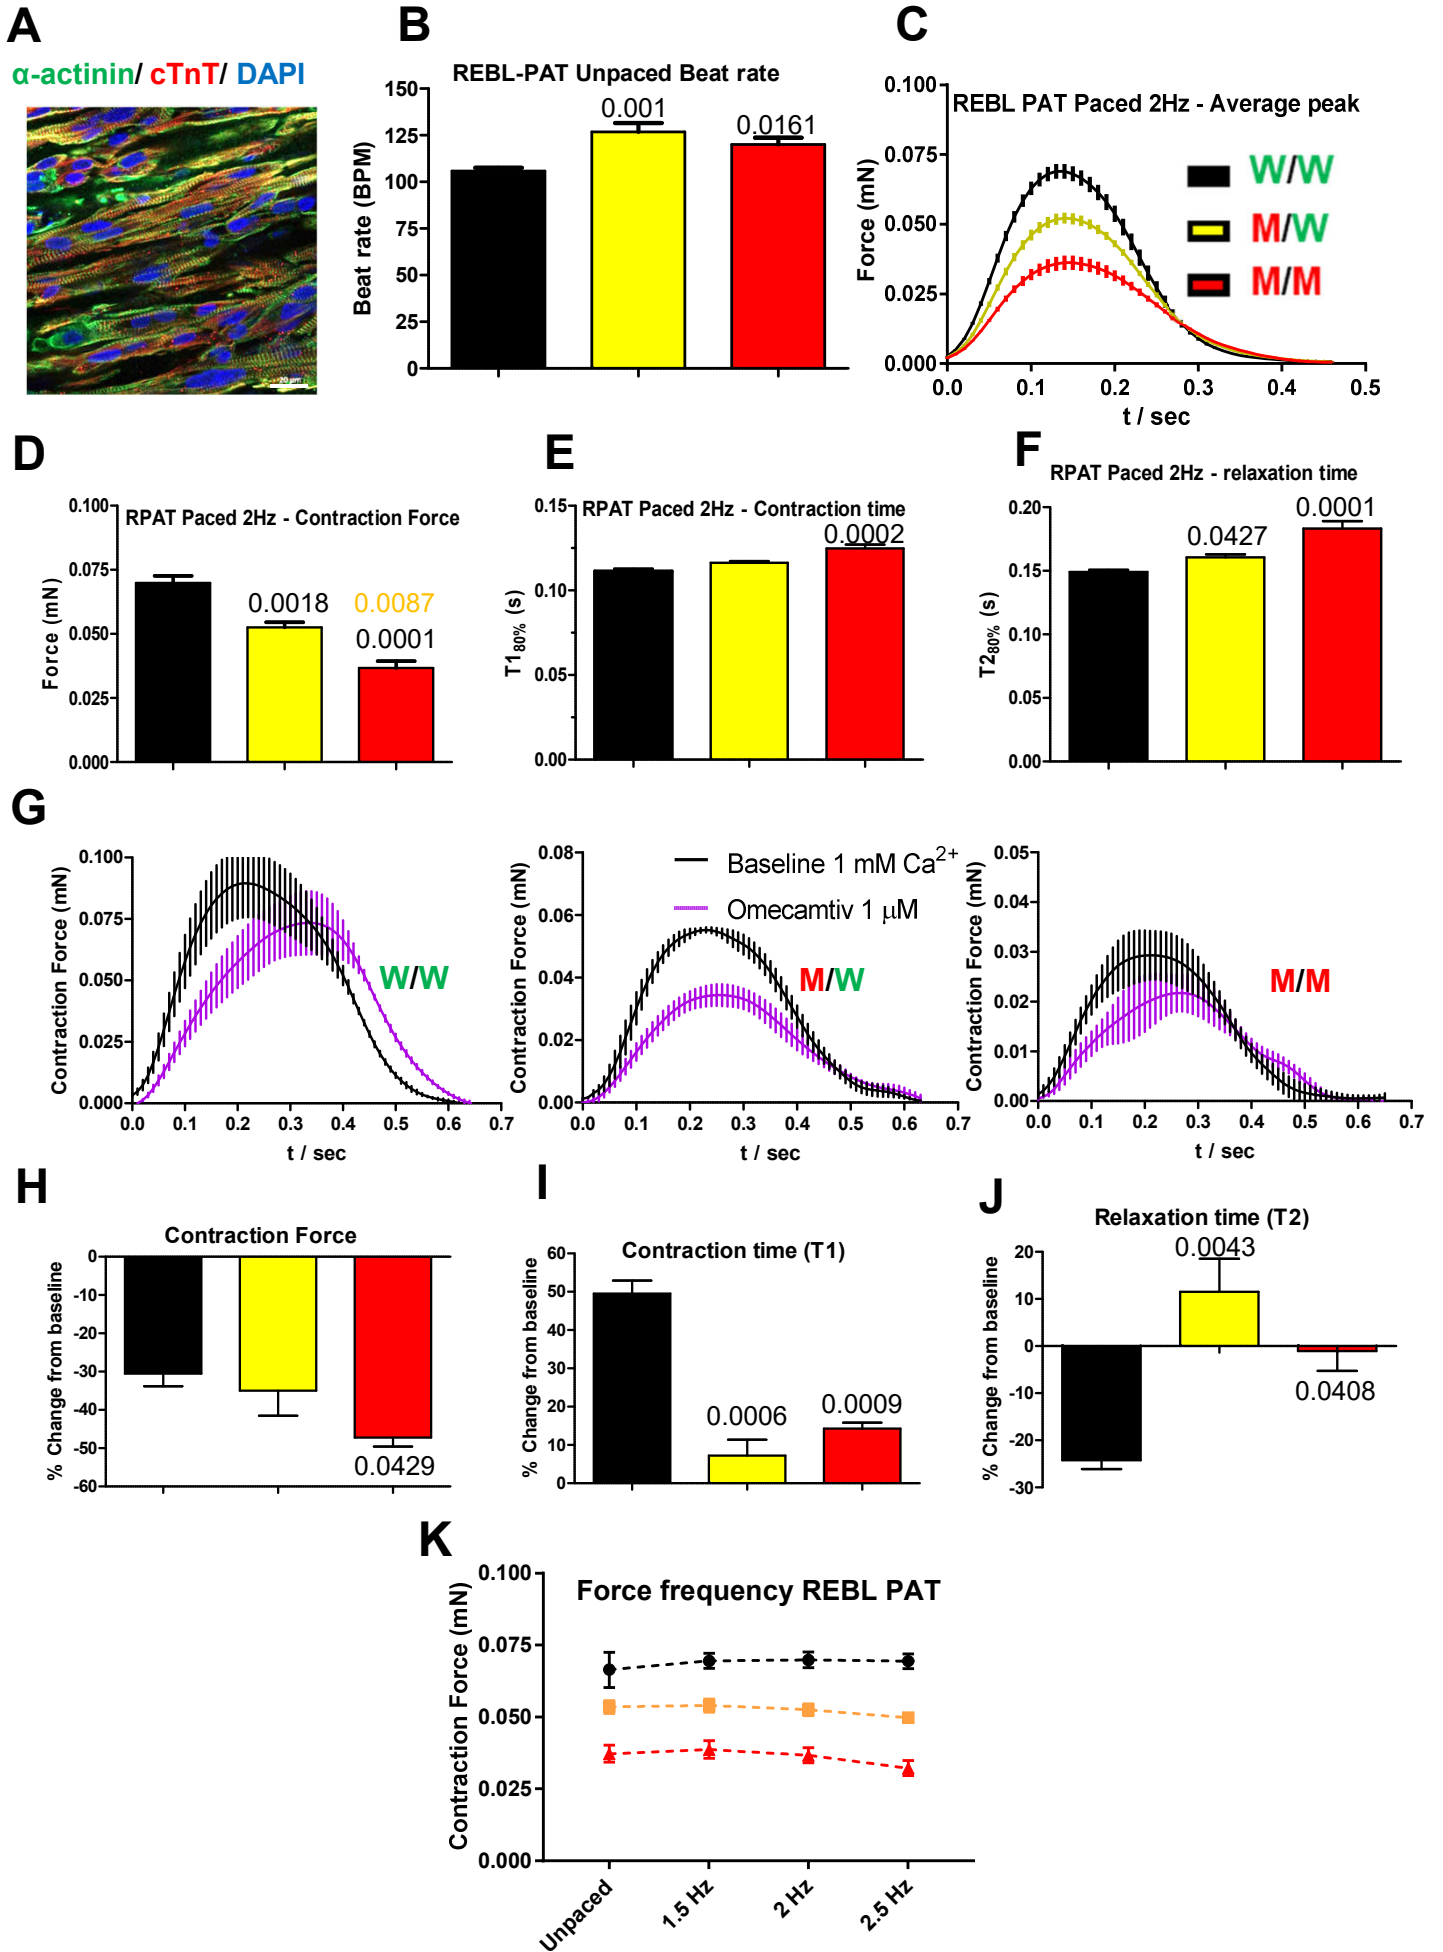



**Figure S9**

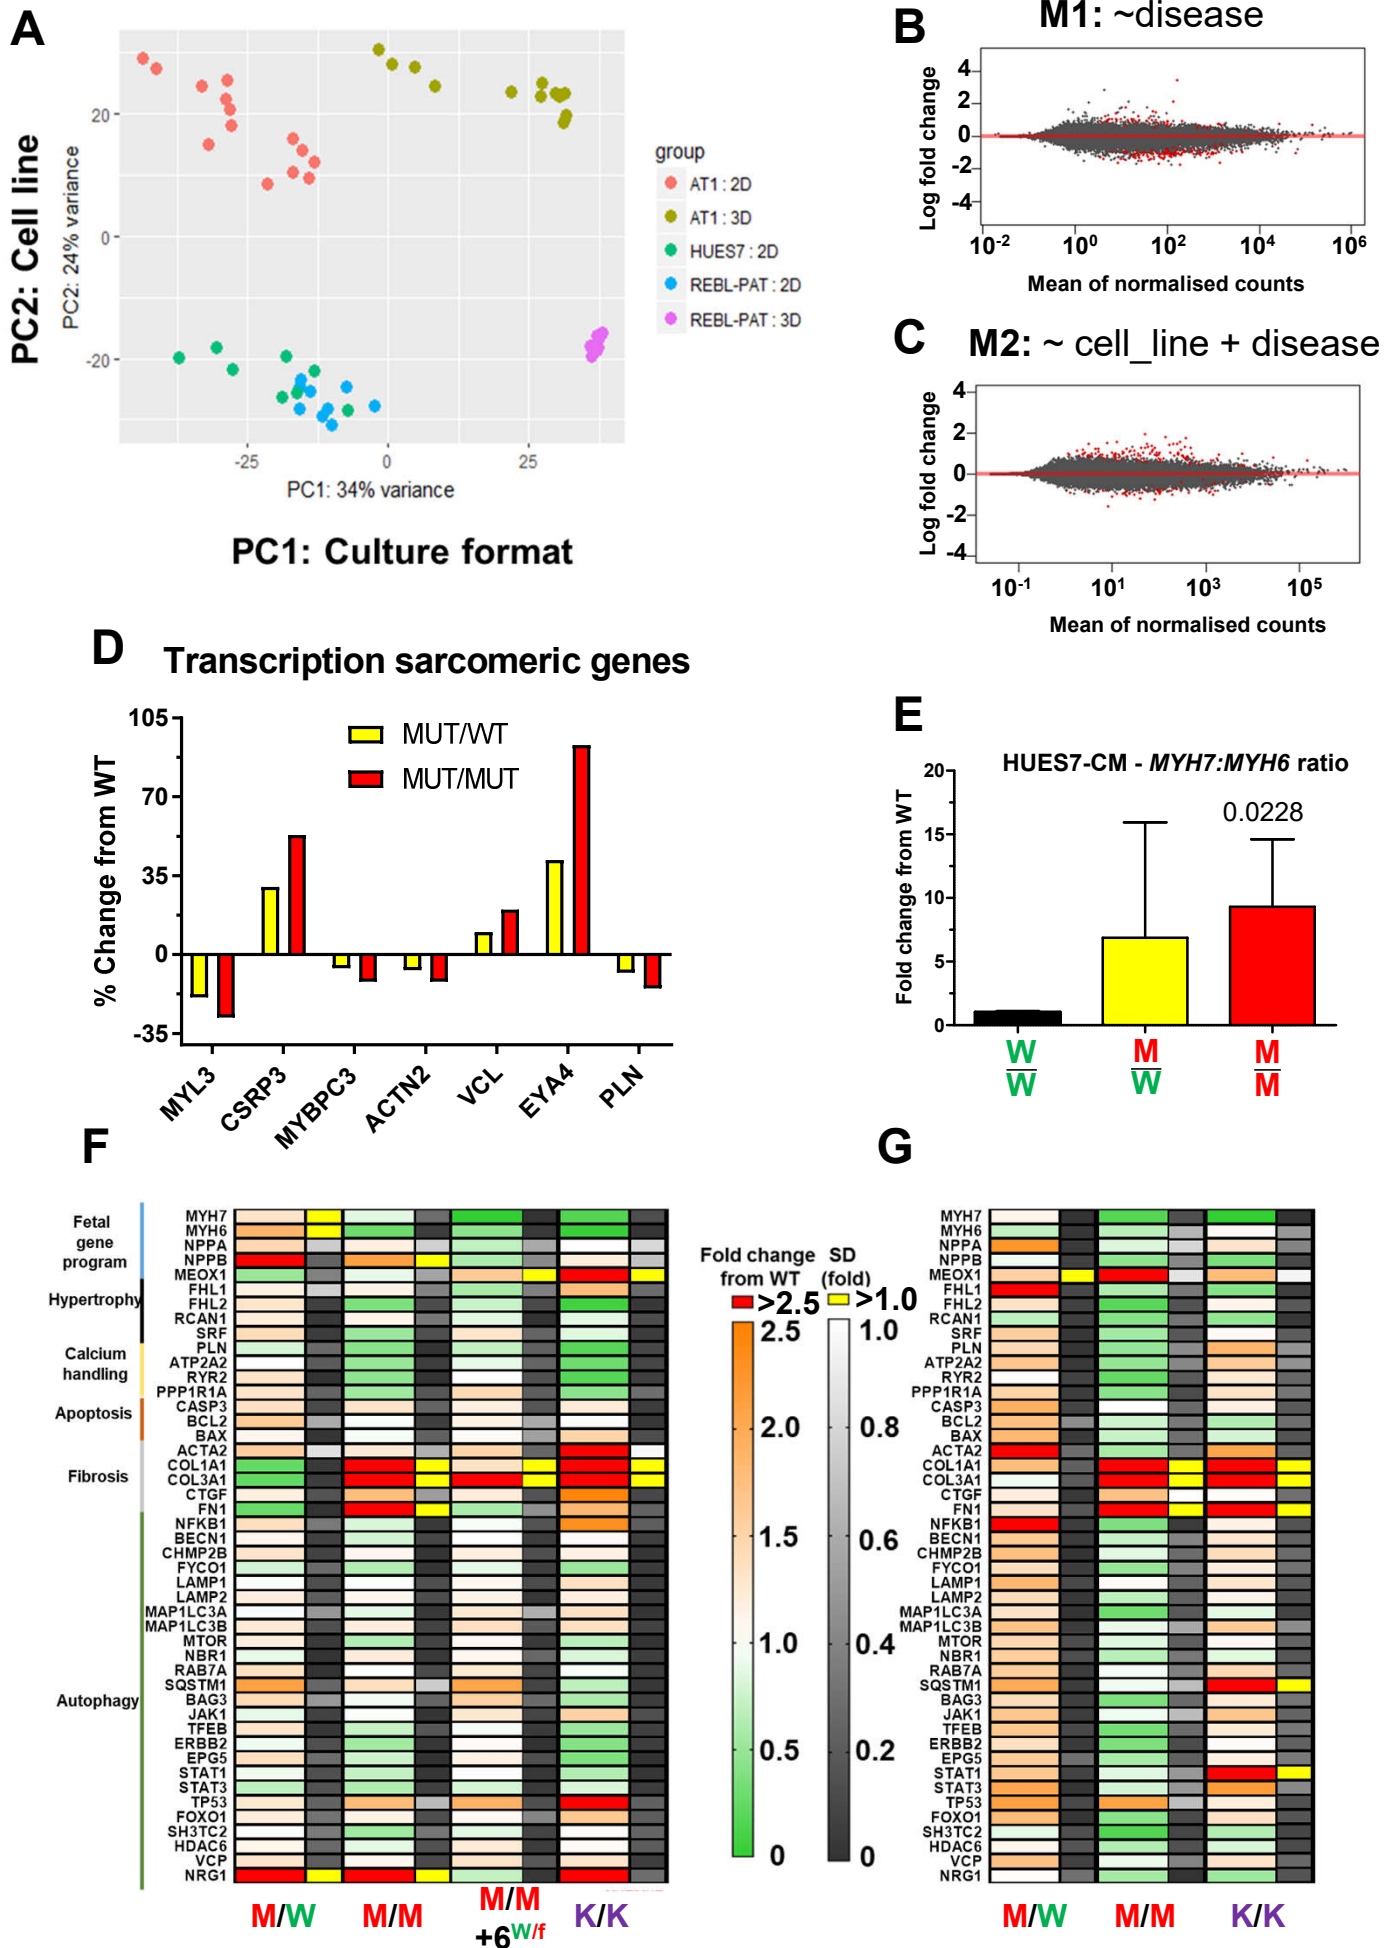

Supplement: NIHMS80373-supplement-Supplementary_Figures.pdf [file NIHMS80373-supplement-Supplementary_Figures.pdf]
